# Supplementary material for: Short-Term Supplemental Dietary Potassium from Potato and Potassium Gluconate: Effect on Calcium Retention and Urinary pH in Pre-Hypertensive-to-Hypertensive Adults
Source: MDPI journal article supplement (doi:10.3390/nu13124399), 2021-12-09
Supplement: s1 [file s1]

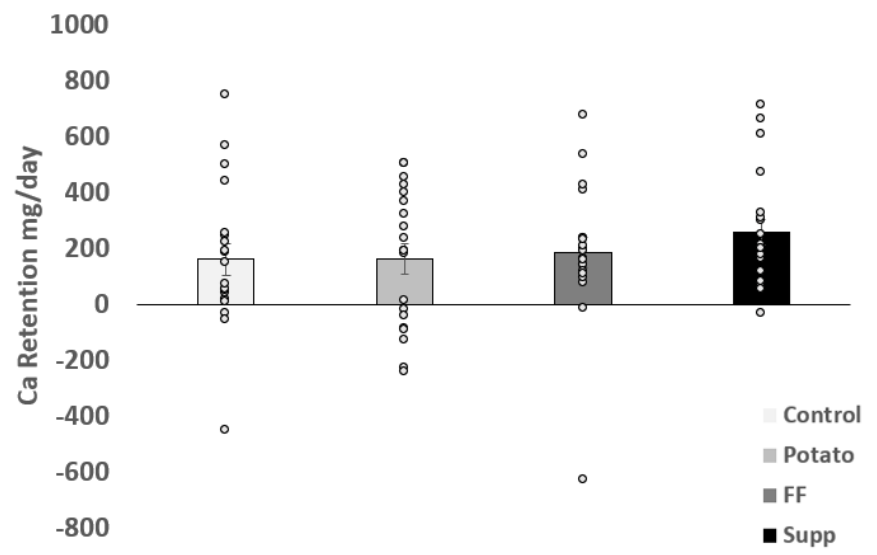

**Figure S1.** Means  $\pm$  SE and individual data distribution of Calcium Retention ( $n = 20$ ) as absolute calcium (Ca) retention. French fries (FF), or K gluconate (Supp).
